# Supplementary material for: Selection for Duration of Fertility and Mule Duck White Plumage Colour in a Synthetic Strain of Ducks (Anas platyrhynchos)
Source: PubMed Central journal article supplement — Asian-Australas J Anim Sci. 2015 May;28(5):605–11. doi: 10.5713/ajas.14.0740 (PMC4412989; doi:10.5713/ajas.14.0740), 2015-05
Supplement: ajas-28-5-605-Supplementary.pdf [file ajas-28-5-605-Supplementary.pdf]

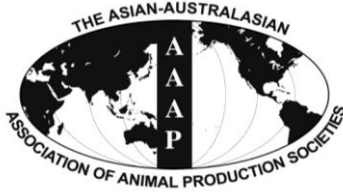

**Open Access**

**Asian Australas. J. Anim. Sci.**

**Vol. 28, No. 5 : 605-611 May 2015**

<http://dx.doi.org/10.5713/ajas.14.0740>

[www.ajas.info](http://www.ajas.info)

pISSN 1011-2367 eISSN 1976-5517

## **Selection for Duration of Fertility and Mule Duck White Plumage Colour in a Synthetic Strain of Ducks (*Anas platyrhynchos*)**

**H. C. Liu, J. F. Huang, S. R. Lee, H. L. Liu<sup>1</sup>, C. H. Hsieh<sup>1</sup>, C. W. Huang<sup>2</sup>, M. C. Huang<sup>3</sup>, C. Tai<sup>4</sup>,  
J. P. Poivey<sup>5</sup>, R. Rouvier<sup>6</sup>, and Y. S. Cheng<sup>1\*</sup>**

Ilan Branch, Livestock Research Institute, Council of Agriculture, Ilan 26845, Taiwan

### **- Supplementary Data -**

### **TABLE OF CONTENTS**

|                             |   |
|-----------------------------|---|
| Supplementary Table S1..... | 2 |
| Supplementary Table S1..... | 3 |
| Supplementary Table S3..... | 3 |

**Supplementary Table S1.** The experimental population for the selection on the duration of fertility in the synthetic strain

| Generation | Strain | Dates of hatch        | Ducks            | Parents                                 | Selected % |
|------------|--------|-----------------------|------------------|-----------------------------------------|------------|
| G0         |        | 2002                  |                  | M=3(Tsaiya)<br>F=6<br>M=3(Pekin)<br>F=6 |            |
| G1         | TxP    | 9/12/2002             | M=21             | M=3                                     | 14.3       |
|            |        | 10/01/2002            | F=42             | F=18                                    | 42.9       |
|            | PxT    | 9/12/2002             | M=19             | M=3                                     | 15.8       |
|            |        | 10/01/2002            | F=20             | F=16                                    | 80.0       |
| G2         | TPxTP  | 10/20/2003            | M=48             |                                         |            |
|            |        | 11/17/2003            | F=381            |                                         |            |
|            |        | 12/15/2003            |                  |                                         |            |
|            | PTxPT  | 01/12/2004            |                  | M=10                                    | 12.3       |
|            |        | 10/20/2003            | M=33             | F=27                                    | 3.8        |
|            |        | 11/17/2003            | F=332            |                                         |            |
| G3         | S      | 12/26/2005-02/24/2006 | M=39             | M=11                                    | 28.2       |
|            |        |                       | F=127            | F=50                                    | 39.4       |
| G4         | S      | 23/09/2006-14/10/2006 | M=87             | M=12                                    | 13.8       |
|            |        |                       | F=236            | F=58                                    | 24.6       |
| G5         | S      | 01/26/2007-23/02/2007 | M=105            | M=12                                    | 11.4       |
|            |        |                       | F=247            | F=55                                    | 22.3       |
| G6         | S      | 10/05/2008-24/05/2008 | M=93             | M=12                                    | 12.9       |
|            |        |                       | F=194            | F=56                                    | 28.9       |
| G7         | S      | 12/21/2009-01/11/2010 | M=102            | M=12                                    | 11.8       |
|            |        |                       | F=244            | F=57                                    | 23.4       |
| G8         | S      | 12/08/2010-12/29/2010 | M=160            | M=13                                    | 8.1        |
|            |        |                       | F=249            | F=57                                    | 22.9       |
| G9         | S      | 11/23/2011-12/12/2011 | M=157            | M=12                                    | 7.6        |
|            |        |                       | F=208            | F=59                                    | 28.4       |
| G10        | S      | 11/05/2012-11/26/2012 | M=166            | M=12                                    | 7.2        |
|            |        |                       | F=261            | F=60                                    | 23.0       |
| Total      |        |                       | M=1030<br>F=2541 | M=118<br>F=525                          |            |

M : number of males; F : number of females.; S : synthetic strain

**Supplementary Table S2.** Mean of inbreeding coefficients in male and female ducks of synthetic strain ducks for each generation

| Generation | Male        | Female      |
|------------|-------------|-------------|
| G1         | 0           | 0           |
| G2         | 0           | 0           |
| G3         | 0.055±0.061 | 0.058±0.058 |
| G4         | 0.071±0.032 | 0.070±0.029 |
| G5         | 0.087±0.029 | 0.089±0.028 |
| G6         | 0.103±0.020 | 0.105±0.020 |
| G7         | 0.119±0.018 | 0.122±0.018 |
| G8         | 0.134±0.040 | 0.134±0.038 |
| G9         | 0.149±0.029 | 0.147±0.028 |
| G10        | 0.166±0.024 | 0.164±0.023 |

**Supplementary Table S3.** The means and standard deviation (SD) of the feather grade of mule ducklings from G4 to G10 of synthetic strain of ducks

| Generation | Feather grade |
|------------|---------------|
| G1         | -             |
| G2         | -             |
| G3         | -             |
| G4         | 5.6 ± 4.0     |
| G5         | 5.9 ± 4.2     |
| G6         | 5.4 ± 4.1     |
| G7         | 3.7 ± 2.5     |
| G8         | 3.6 ± 2.3     |
| G9         | 3.7 ± 3.3     |
| G10        | 3.0 ± 2.7     |
